# Supplementary material
Source: bioRxiv or medRxiv preprint supplement (https://www.biorxiv.org/highwire/filestream/87607/field_highwire_adjunct_files/0/284125-1.pdf)
Supplement: Supplementary file [file 284125-1.pdf]

1 **Supplementary data.**

2  
3

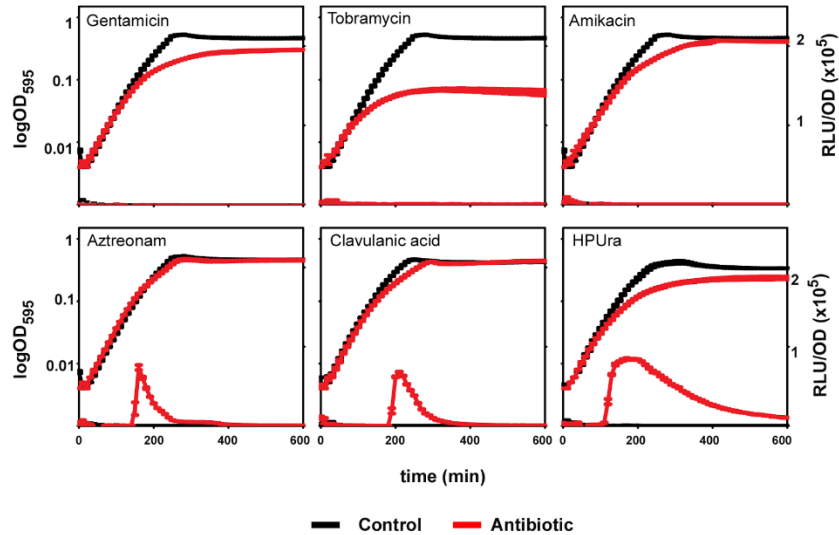

4

5 **Figure S1. Growth curves ( $OD_{595}$ ) and bioluminescence activity ( $RLU/OD_{595}$ ) of *htrA* mutant in presence of several**  
 6 **antibiotics.** Strain ADP1 (*P<sub>ssb</sub>-luc, htrA::ery*) was grown in C+Y medium at pH 7.35 with (red lines) or without (black

7 lines) addition of the antibiotics. Average of 3 replicates and Standard Error of the Mean (SEM) are plotted. Antibiotics

8 used: 10  $\mu\text{g/ml}$  gentamicin, 28  $\mu\text{g/ml}$  tobramycin, 28  $\mu\text{g/ml}$  amikacin, 28  $\mu\text{g/ml}$  aztreonam, 2  $\mu\text{g/ml}$  clavulanic acid, and

9 0.15  $\mu\text{g/ml}$  HPUra. Aminoglycosides are not able to induce competence in the *htrA* mutant, as suggested before

10 (Stevens et al. 2011). However, both aztreonam and clavulanic acid induce competence by another mechanism, as

11 well as HPUra (Slager et al. 2014).

12

13

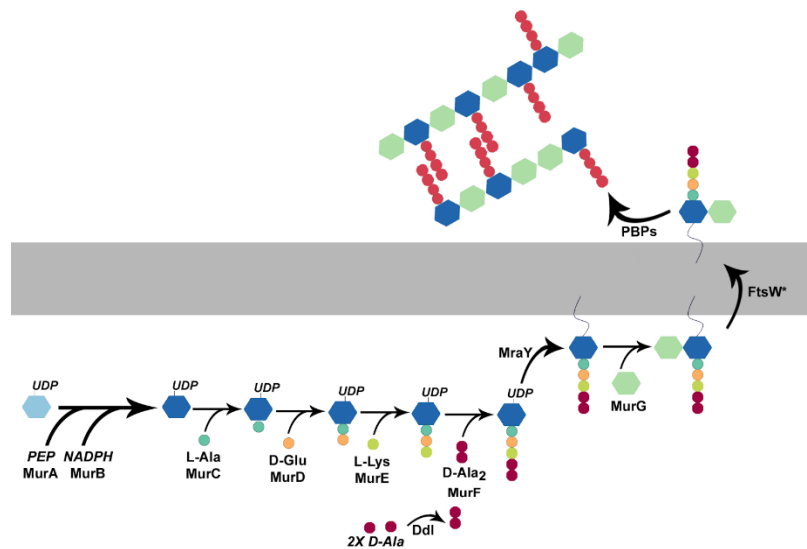

14

15 **Figure S2. Representation of the cell wall synthesis in *Streptococcus pneumoniae*.** The first stage of the

16 peptidoglycan synthesis is the assembling of the pentapeptide, constituted by six enzymes (MurA-F). The second stage,

17 which occurs on the intracellular part of the membrane, drives the synthesis of the lipid II (*mraY* and MurG). Then, the

18 lipid II is flipped and showed at the external part of the membrane, potentially by FtsW. The final stage occurs on the  
 19 extracellular face of the membrane, and involves the continuous transglycosylation and transpeptidation activities of  
 20 the Penicillin-Binding Proteins (PBPs).

21  
 22

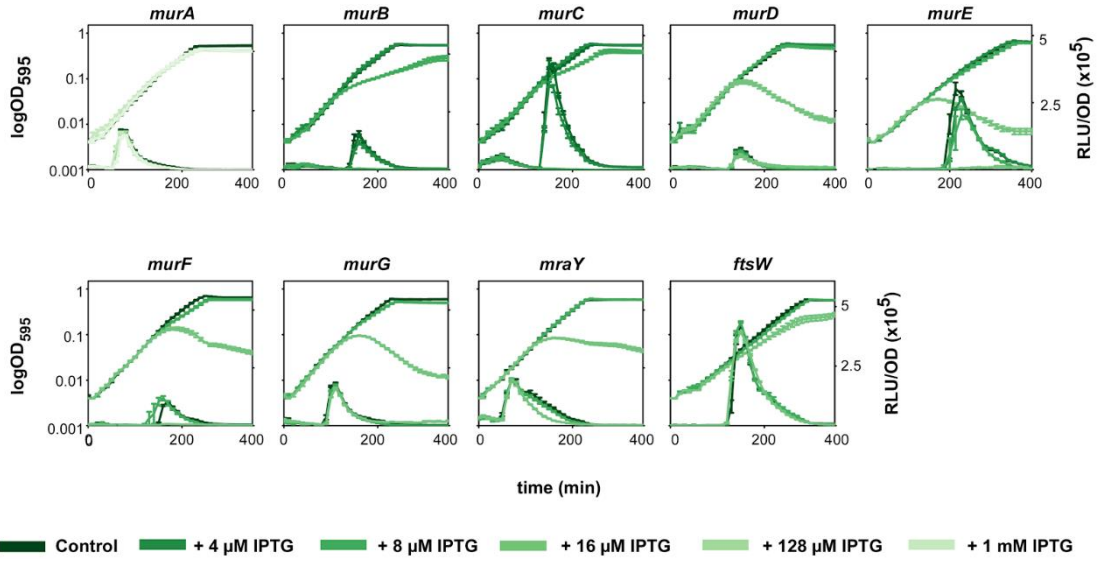

23

24 **Figure S3. Repression of genes involved in pentapeptide (*murA-F*) and lipid II (*murG* and *mraY*) formation, and**  
 25 **its putative flippase (*ftsW*) by CRISPRi.** No effect on competence was observed after depleting the individual genes.  
 26 Detection of competence development was performed in C+Y medium at a permissive pH 7.5 for natural competence.  
 27 IPTG was added to the medium at the beginning, at different final concentrations (128  $\mu$ M and 1 mM for *murA*; 4  $\mu$ M  
 28 and 8  $\mu$ M for *murB* and *murC*; 8  $\mu$ M and 16  $\mu$ M for the other genes). The values represent averages of three replicates  
 29 with SEM. Experiments were also reproduced at pH 7.35 (non-permissive) to confirm that the depletion of none of these  
 30 genes cause an upregulation of competence (data not shown).

31

32

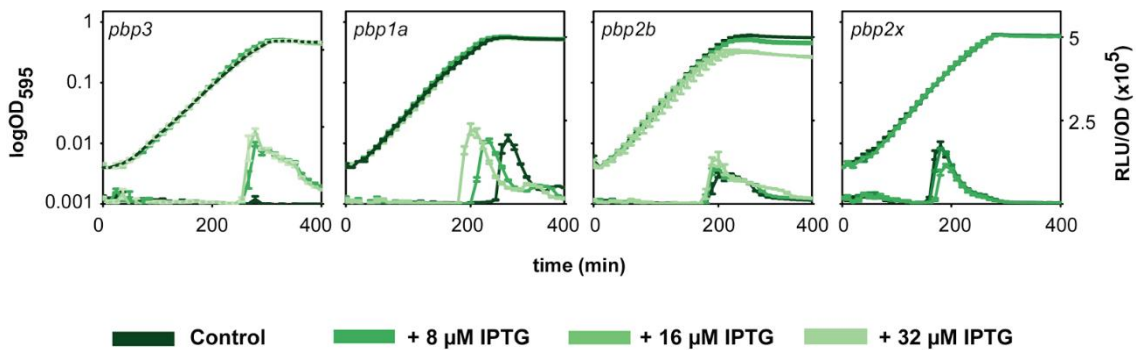

33

34

35 **Figure S4. CRISPRi-dependent downregulation of *pbp1a* and *pbp3* leads to competence induction.** Depletion of  
 36 *pbp1a* and *pbp3* by induction of dCas9 with IPTG upregulates competence development. In contrast, depletion of *pbp2b*  
 37 and *pbp2x* does not have any effect on the regulation of this process. Detection of competence development was  
 38 performed in C+Y medium at a permissive pH (pH 7.5). IPTG was added to the medium at the beginning, at different  
 39 final concentrations (8  $\mu$ M and 16  $\mu$ M for *pbp1a*; 16  $\mu$ M and 32  $\mu$ M for the other *pbp* genes). The values represent  
 40 averages of three replicates with SEM.

41

42

43

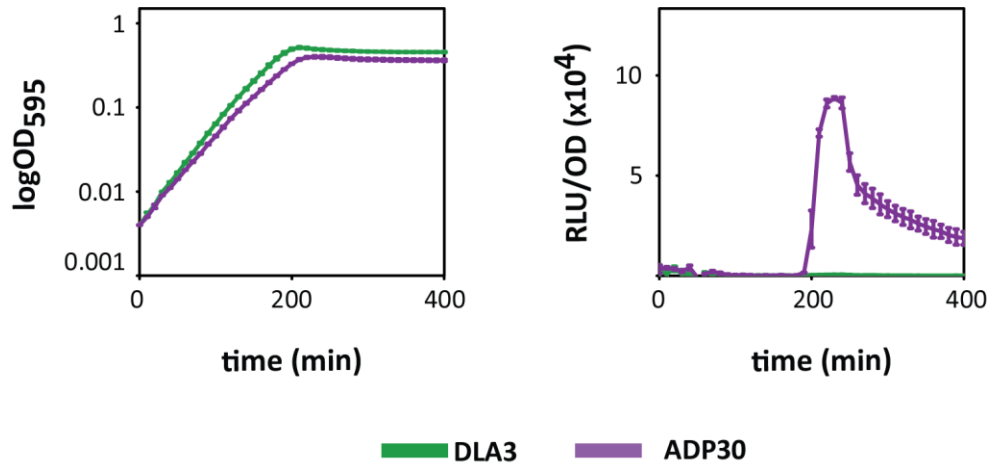

44

45 **Figure S5. Natural competence in DLA3 ( $P_{ssb}-luc$ ) and ADP30 ( $P_{ssb}-luc, pbp3::chl$ ).** To confirm that *pbp3* is involved  
 46 in competence development, we compared the natural competence activation of the wild type (DLA3) with the *pbp3*  
 47 mutant (ADP30). At pH 7.35, only the mutant was able to become competent, confirming the upregulation of this  
 48 pathway in absence of PBP3.

49

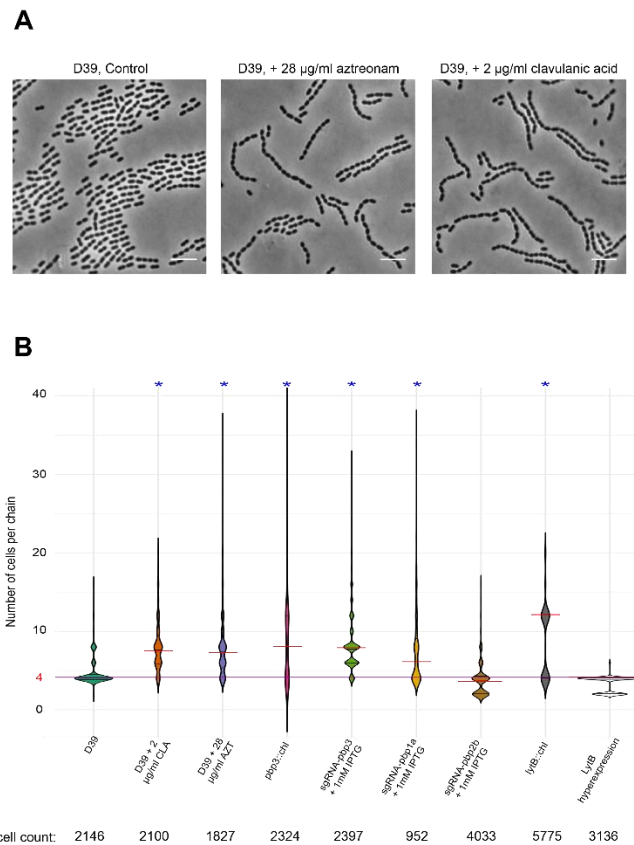

50

51 **Figure S6. AZT and CLA induce chain formation.** Cells were grown in C+Y acid medium until OD 0.4 (stationary  
 52 fase). **A) Phase-contrast images.** Scale: 6 µm. **B) Length of the chains.** Horizontal red line means the average of  
 53 the number of cells per chain while the purple line highlights the control condition. The addition of AZT or CLA results  
 54 in the presence of longer chains, as does the deletion and depletion of *pbp3*. Depletion of *pbp1a* induces chain

55 formation, contrary to the *pbp2b* depletion phenotype. The absence of *lytB* also resulted in an increase of chain length,  
56 while its overexpression restores normal chain length.

57

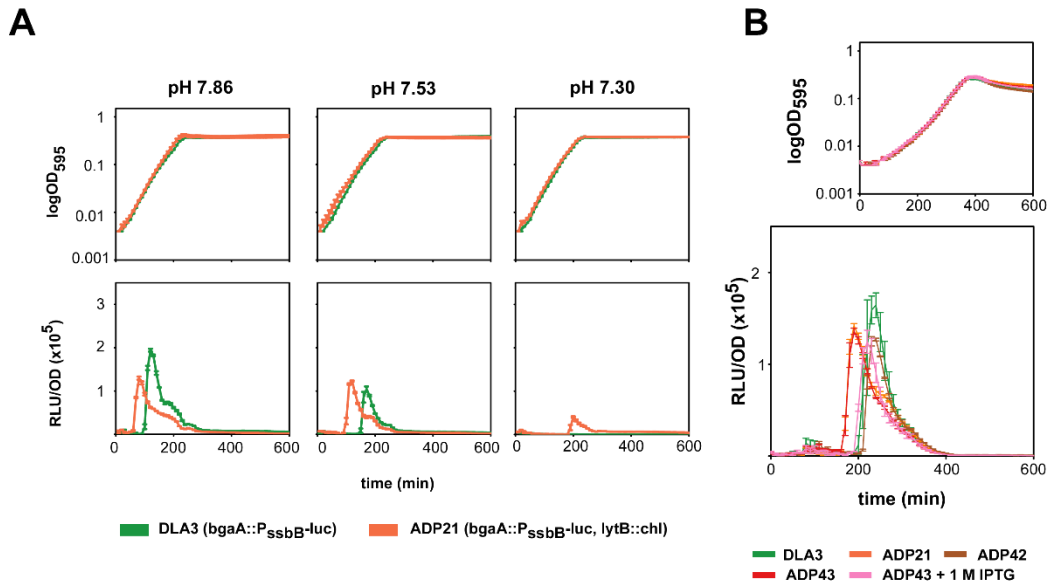

58

59 **Figure S7. A) Natural competence in DLA3 (*P<sub>ssbB</sub>-luc*) and ADP21 (*P<sub>ssbB</sub>-luc, lytB::chl*), in a range of three different**  
60 **pHs.** In all the conditions, the *lytB* mutant strain showed an earlier development of competence. Even at pH 7.30, where  
61 the wild type strain did not become competent, the *lytB* mutant showed bioluminescence activity, implying competence  
62 activation. **B) LytB complementation restores normal natural competence.** Strains showing a chainy phenotype  
63 [ADP21 (*lytB::chl*) and ADP43 (inducible *lytB* in *lytB::chl* background without presence of the inducer IPTG)] were  
64 overcompetent compared with strains showing a wild type phenotype [DLA3 (control), ADP42 (constitutive expression  
65 of *LytB*) or the induction of *LytB* in ADP43 with 1M IPTG].

66

A

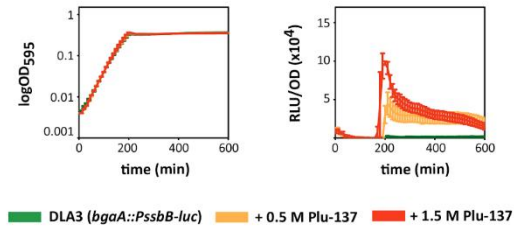

B

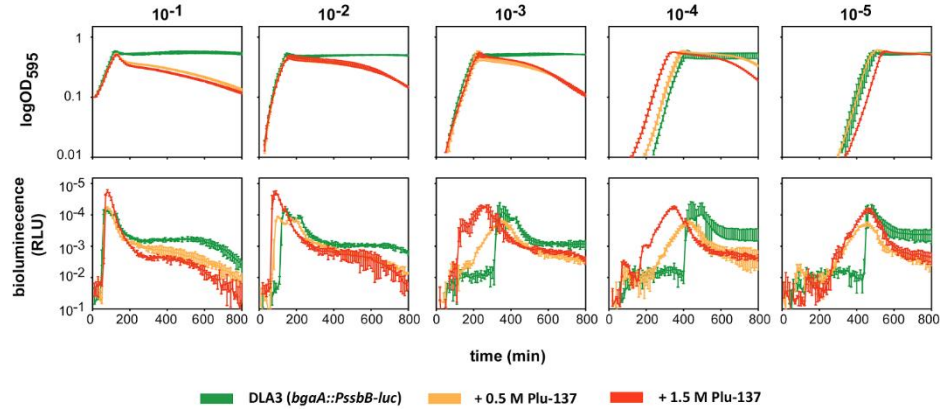

67

68 **Figure S8. A) Effect of medium density on natural competence development.** The addition of increasing  
 69 concentration of Pluronic-137 results in a lower diffusion of the CSP and thereby a strong and earlier natural  
 70 competence induction. Cells were grown in C+Y pH 7.3 with or without the indicated concentration of Pluronic 137. **B)**  
 71 **Synchronization of competence is affected by a reduction of CSP diffusion.** Growth curves ( $OD_{595}$ ; up) and  
 72 competence expression (relative luminescence units; down) in a range of initial densities. Cell were grown in C+Y no  
 73 acid (green), or in presence of 0.5 M (orange) or 1.5 M (red) of the polymer Pluronic-137 (P-137). Average of 3 replicates  
 74 and Standard Error of the Mean (SEM) are plotted for each of five inoculation densities:  $OD_{595}$   $10^{-1}$ ,  $10^{-2}$ ,  $10^{-3}$ ,  $10^{-4}$  and  
 75  $10^{-5}$ .

76

**Table S1. List of antibiotics tested for competence induction.**

| <b>Bacterial target</b>      | <b>Antibiotic class</b>          | <b>Antibiotic*</b>                 | <b>Concentration range (µg/mL)</b> |
|------------------------------|----------------------------------|------------------------------------|------------------------------------|
| Cell-wall inhibitors         | Beta-lactams (carbapenems)       | Imipenem                           | 0.015 - 0.12                       |
|                              |                                  | Meropenem                          | 0.015 - 0.12                       |
|                              | Beta-lactams (monobactams)       | <b>Aztreonam</b>                   | 12.5 – 100                         |
|                              | Beta-lactams (amino-penicillins) | Methicillin                        | 0.016 - 2                          |
|                              |                                  | Ampicillin                         | 0.0015 – 0.25                      |
|                              |                                  | Amoxicillin                        | 0.0015 – 0.25                      |
|                              |                                  | <b>Amoxicillin/Clavulanic acid</b> | 0.0015/2 – 0.25/2                  |
|                              | Beta-lactams (Cephalosporins)    | Cephalexin (1st generation)        | 0.006 - 1                          |
|                              |                                  | Cefaclor (2nd generation)          | 0.006 – 1                          |
|                              |                                  | Cefuroxime (2nd generation)        | 0.006 – 1                          |
|                              |                                  | Cefotaxime (3rd generation)        | 0.006 – 1                          |
|                              |                                  | Cefepime (4th generation)          | 0.006 – 1                          |
|                              | Beta-lactams (antipseudomonal)   | Piperacillin                       | 0.003 – 0.12                       |
|                              | Beta-lactamase inhibitors        | <b>Clavulanic acid</b>             | 0.5 – 8                            |
| DNA replication inhibition   | Fluoroquinolones                 | <b>Ciprofloxacin</b>               | 0.4                                |
|                              | -                                | <b>HPUra</b>                       | 0.15                               |
| Protein synthesis inhibition | Aminoglycosides                  | <b>Gentamicin</b>                  | 5 – 100                            |
|                              |                                  | <b>Amikacin</b>                    | 5 – 100                            |
|                              | Macrolides                       | Clarithromycin (14 carbons)        | 0.003 – 0.12                       |
|                              |                                  | Azithromycin (15 carbons)          | 0.003 – 0.12                       |
|                              |                                  | Josamycin (16 carbons)             | 0.003 – 0.12                       |
|                              | Oxazolidinones                   | Linezolid                          | 0.06 - 0.5                         |

\*In bold, antibiotics that induce competence in C+Y pH 7.35.

81 **Table S2. Intraspecific *in vitro* horizontal gene transfer (HGT) of antimicrobial resistance**  
 82 **determinants\*.**

| pH  | Experiment             | No. of transformants (cfu/ml)*             | Total viable count (cfu/ml)                      | Transformation efficiency (%)               |
|-----|------------------------|--------------------------------------------|--------------------------------------------------|---------------------------------------------|
| 7.3 | DLA3 + MK134 (control) | $0 \pm 0$ cfu/ml                           | $1.4 \cdot 10^{11} \pm 4.0 \cdot 10^{10}$ cfu/ml | $0 \pm 0$ %                                 |
|     | DLA3 + MK134 + AZT     | $6.2 \cdot 10^4 \pm 4.1 \cdot 10^3$ cfu/ml | $9.0 \cdot 10^{10} \pm 2.7 \cdot 10^{10}$ cfu/ml | $7.0 \cdot 10^{-5} \pm 2.3 \cdot 10^{-5}$ % |
|     | DLA3 + MK134 + CLA     | $2.1 \cdot 10^4 \pm 1.0 \cdot 10^4$ cfu/ml | $9.3 \cdot 10^{10} \pm 1.5 \cdot 10^{10}$ cfu/ml | $2.3 \cdot 10^{-5} \pm 1.4 \cdot 10^{-5}$ % |
| 7.5 | DLA3 + MK134 (control) | $2.0 \cdot 10^3 \pm 1.0 \cdot 10^3$ cfu/ml | $1.4 \cdot 10^{11} \pm 3.1 \cdot 10^{10}$ cfu/ml | $1.3 \cdot 10^{-5} \pm 4.3 \cdot 10^{-7}$ % |
|     | DLA3 + MK134 + AZT     | $8.4 \cdot 10^4 \pm 4.9 \cdot 10^3$ cfu/ml | $9.0 \cdot 10^{10} \pm 2.6 \cdot 10^{10}$ cfu/ml | $9.9 \cdot 10^{-5} \pm 3.0 \cdot 10^{-5}$ % |
|     | DLA3 + MK134 + CLA     | $5.3 \cdot 10^4 \pm 7.5 \cdot 10^3$ cfu/ml | $9.3 \cdot 10^{10} \pm 1.5 \cdot 10^{10}$ cfu/ml | $5.9 \cdot 10^{-5} \pm 1.7 \cdot 10^{-5}$ % |

83  
 84 \* Three independent replicates per condition were performed. Strains: DLA3 (D39, *bgaA::P<sub>ssb</sub>-luc*, tetracycline  
 85 resistance marker), MK134 (D39, *ssbB-luc*, kanamycin resistance marker). Abbreviations: AZT = 28 µg/ml of  
 86 aztreonam, CLA = 2 µg/ml of clavulanic acid.

87  
 88 **Table S3. Interspecific transfer of DNA from *E. coli* to *S. pneumoniae* promoted by aztreonam.**

| Experiment                               | No. of transformants (cfu/ml)*             | Total viable count (cfu/ml)                | Transformation efficiency (%)               |
|------------------------------------------|--------------------------------------------|--------------------------------------------|---------------------------------------------|
| pLA18 <i>E. coli</i> + D39<br>SPNE       | $0 \pm 0$ cfu/ml                           | $1.9 \cdot 10^8 \pm 7.8 \cdot 10^6$ cfu/ml | $0 \pm 0$                                   |
| pLA18 <i>E. coli</i> + D39<br>SPNE + AZT | $3.4 \cdot 10^4 \pm 8.5 \cdot 10^3$ cfu/ml | $1.0 \cdot 10^8 \pm 3.5 \cdot 10^6$ cfu/ml | $3.3 \cdot 10^{-2} \pm 9.3 \cdot 10^{-3}$ % |

89  
 90 \* Three independent replicates per condition were performed. Abbreviations: AZT: 28 µg/ml of aztreonam; SPNE:  
 91 *Streptococcus pneumoniae*; *E. coli*: *Escherichia coli* DH5α carrying the high-copy plasmid pLA18, with the  
 92 tetracycline resistance marker *tetM*. Both SPNE and *E. coli* were co-incubated at the same initial concentration  
 93 (OD<sub>595</sub> 0.04).

94  
 95  
 96 **Table S4. Functional analysis of the microarray experiments of *S. pneumoniae* ADP62 (*comC::chl*)**  
 97 **grown in presence or absence of antibiotics**

| Condition | Gene regulation | Class       | Single list | Class Size                     | Description                                                |
|-----------|-----------------|-------------|-------------|--------------------------------|------------------------------------------------------------|
| AZT (RE)  | upregulation    | -           |             |                                |                                                            |
|           | downregulation  | COG         | 0.00 (3)    | 209                            | Cell wall/membrane/envelope biogenesis                     |
|           |                 | COG         | 0.00 (3)    | 159                            | Inorganic ion transport and metabolism                     |
|           |                 | GO          | 0.00022 (2) | 7                              | GO:0005315 - phosphate transmembrane transporter activity  |
|           |                 | GO          | 0.00051 (3) | 92                             | GO:0006810 - transport                                     |
|           |                 | GO          | 0.00194 (3) | 164                            | GO:0016020 - membrane                                      |
|           |                 | KEYWORDS    | 0.00258 (3) | 121                            | IPR003439 - ABC transporter-like                           |
|           | KEYWORDS        | 0.00082 (3) | 66          | IPR003445 - Cation transporter |                                                            |
| AZT (AE)  | upregulation    | -           |             |                                |                                                            |
|           | downregulation  | COG         | 0.000 (3)   | 209                            | Cell wall/membrane/envelope biogenesis                     |
|           |                 | GO          | 0.00022 (2) | 7                              | GO:0005315 - phosphate transmembrane transporter activity  |
|           |                 | Others      | 0.0e+00 (4) | 23                             | t_RNA-Ser                                                  |
|           |                 | Others      | 2.1e-06 (2) | 2                              | Serine protease                                            |
| CLA (RE)  | upregulation    | -           |             |                                |                                                            |
|           | downregulation  | -           |             |                                |                                                            |
| CLA (AE)  | upregulation    | -           |             |                                |                                                            |
|           | downregulation  | COG         | 0.00 (5)    | 209                            | Cell wall/membrane/envelope biogenesis                     |
|           |                 | COG         | 0.00 (4)    | 159                            | Inorganic ion transport and metabolism                     |
|           |                 | GO          | 7.4e-05 (2) | 7                              | GO:0005315 - inorganic phosphate transmembrane transporter |
|           |                 | GO          | 0.0e+00 (4) | 92                             | GO:0006810 - transport                                     |
|           | GO              | 0.0e+00 (5) | 164         | GO:0016020 - membrane          |                                                            |



|          |             |     |                                                   |
|----------|-------------|-----|---------------------------------------------------|
| IPR      | 0.00 (3)    | 37  | IPR000515 - MetI-like domain                      |
| KEYWORDS | 0.0e+00 (4) | 121 | IPR003439 - ABC transporter-like                  |
| KEYWORDS | 6.9e-05 (3) | 42  | IPR000515 - MetI-like domain                      |
| KEYWORDS | 0.0e+00 (4) | 66  | IPR003445 - Cation transporter                    |
| Pfam     | 0.00 (3)    | 37  | PF00528 - Binding-transport system inner membrane |
| Other    | 0.00 (3)    | 37  | SSF161098 - MetI-like                             |

98  
99 Abbreviations: AZT: aztreonam, CLA: clavulanic acid, RE: rapid exposure, AE: adaptive exposure; COG:  
100 clusters of orthologous groups, GO: gene ontology, IPR: interpro

101

102

103 **Table S5. Summary of gene expression changes in transcriptome comparison of *S. pneumoniae***  
104 **D39 grown in presence or absence of antibiotics**

105

| Condition | gene modulation | locus           | gene description                                               | log. fold change |
|-----------|-----------------|-----------------|----------------------------------------------------------------|------------------|
| AZT (RE)  | downregulation  | <b>SPD_0741</b> | Putative deoxyribose-specific ABC transporter permease protein | - 1.10           |
|           |                 | <b>SPD_1231</b> | Phosphate transport system permease protein PstC2              | - 1.12           |
|           |                 | SPD_1393        | pyridine nucleotide-disulfide oxidoreductase family protein    | - 1.32           |
|           |                 | <b>SPD_1230</b> | Phosphate transport system permease protein PstA2              | - 1.35           |
|           |                 | <b>SPD_0555</b> | Antibiotic ABC transporter permease protein                    | - 1.48           |
| AZT (AE)  | downregulation  | SPD_1682        | tRNA-Ser2                                                      | -1,01            |
|           |                 | <b>SPD_1231</b> | Phosphate transport system permease protein PstC2              | -1,01            |
|           |                 | SPD_1695        | tRNA-Leu3                                                      | -1,13            |
|           |                 | SPD_1685        | tRNA-Phe1                                                      | -1,13            |
|           |                 | <b>SPD_1230</b> | Phosphate transport system permease protein PstA2              | -1,19            |

|          |                |                 |                                                                |        |
|----------|----------------|-----------------|----------------------------------------------------------------|--------|
|          |                | SPD_1760        | tRNA-Cys1                                                      | -1,22  |
|          |                | SPD_2069        | SpoJ protein                                                   | -1,34  |
|          |                | <b>SPD_0555</b> | Antibiotic ABC transporter permease protein                    | -1,36  |
|          |                | SPD_2068        | Serine protease                                                | -1,40  |
|          |                | SPD_0913        | Hypothetical protein                                           | -1,46  |
|          |                | <b>SPD_1697</b> | tRNA-Asp-GTC                                                   | -1,98  |
|          |                | SPD_1874        | LysM domain-containing protein                                 | -2,37  |
| CLA (RE) | upregulation   | SPD_0620        | Lysyl-tRNA synthetase                                          | 2.31   |
|          |                | SPD_2028        | Choline binding protein D                                      | 1.90   |
|          |                | SPD_1654        | Ribosomal large subunit pseudouridine synthase B               | 1.08   |
|          |                | SPD_0919        | Hypothetical protein                                           | 1.04   |
|          | downregulation | SPD_1697        | tRNA-Asp-GTC                                                   | - 1.01 |
|          |                | SPD_0361        | Transcriptional regulon                                        | - 1.10 |
| CLA (AE) | upregulation   | SPD_1181        | Hypothetical protein                                           | 1.19   |
|          |                | SPD_2007        | Transporter major facilitator family protein                   | 1.16   |
|          |                | SPD_0141        | Hypothetical protein                                           | 1.04   |
|          |                | SPD_0293        | PTS system transporter subunit IIA                             | 1.02   |
|          |                | SPD_0934        | Tn5252, ORF 10 protein                                         | 1.01   |
|          | downregulation | SPD_1738        | MATE efflux family protein DinF                                | - 1.01 |
|          |                | SPD_1220        | Spermidine/putrescine ABC transporter permease                 | - 1.01 |
|          |                | <b>SPD_0741</b> | Putative deoxyribose-specific ABC transporter permease protein | - 1.15 |
|          |                | <b>SPD_1231</b> | Phosphate transport system permease protein PstC2              | - 1.23 |
|          |                | <b>SPD_1230</b> | Phosphate transport system permease protein PstA2              | - 1.43 |
|          |                | <b>SPD_0555</b> | Antibiotic ABC transporter permease protein                    | - 1.53 |
|          |                | <b>SPD_1697</b> | tRNA-Asp-GTC                                                   | - 1.57 |

106  
 107 Abbreviations: AZT: aztreonam, CLA: clavulanic acid, RE: rapid exposure, AE: adaptive exposure. In  
 108 bold, genes with transcriptome changes in more than one condition.

109

110

111 **Table S6. List of strains used.**

112

| <b><i>S. pneumoniae</i></b><br><b>strains</b> | <b>Relevant genotype</b>                                                                                                   | <b>Reference</b>         |
|-----------------------------------------------|----------------------------------------------------------------------------------------------------------------------------|--------------------------|
| D39                                           | Serotype 2 strain                                                                                                          | Avery et al. 1944        |
| DLA3                                          | $\Delta bgaA::P_{ssbB}-luc-gfp$                                                                                            | Slager et al. 2014       |
| MK134                                         | <i>ssbB-luc</i>                                                                                                            | (Slager et al. 2014      |
| ADP21                                         | $\Delta bgaA::P_{ssbB}-luc-gfp$ , <i>lytB::chl</i>                                                                         | This study               |
| ADP30                                         | $\Delta bgaA::P_{ssbB}-luc-gfp$ , <i>dacC::chl</i>                                                                         | This study               |
| ADP42                                         | $\Delta bgaA::P_{ssbB}-luc-gfp$ , <i>cep::P_{Lac}-lytB</i> , <i>lytB::chl</i>                                              | This study               |
| ADP43                                         | $\Delta bgaA::P_{ssbB}-luc-gfp$ , <i>cep::P_{Lac}-lytB</i> , <i>lytB::chl</i> , <i>prsA::P_{F6}-lacI</i> , <i>ssbB-luc</i> | This study               |
| ADP62                                         | $\Delta bgaA::P_{ssbB}-luc-gfp$ , <i>comC::chl</i>                                                                         | Moreno-Gómez et al. 2017 |
| ADP157                                        | $\Delta cep::P_3-sgRNA-pbp1A$ , $\Delta bgaA::P_{Lac}-dCas9$ , <i>prsA::P_{F6}-lacI</i> , <i>ssbB-luc</i>                  | This study               |
| ADP161                                        | $\Delta cep::P_3-sgRNA-pbp2b$ , $\Delta bgaA::P_{Lac}-dCas9$ , <i>prsA::P_{F6}-lacI</i> , <i>ssbB-luc</i>                  | This study               |
| ADP165                                        | $\Delta cep::P_3-sgRNA-murB$ , $\Delta bgaA::P_{Lac}-dCas9$ , <i>prsA::P_{F6}-lacI</i> , <i>ssbB-luc</i>                   | This study               |
| ADP173                                        | $\Delta cep::P_3-sgRNA-murA-2$ , $\Delta bgaA::P_{Lac}-dCas9$ , <i>prsA::P_{F6}-lacI</i> , <i>ssbB-luc</i>                 | This study               |
| ADP177                                        | $\Delta cep::P_3-sgRNA-pbp2x$ , $\Delta bgaA::P_{Lac}-dCas9$ , <i>prsA::P_{F6}-lacI</i> , <i>ssbB-luc</i>                  | This study               |
| ADP178                                        | $\Delta cep::P_3-sgRNA-mraY$ , $\Delta bgaA::P_{Lac}-dCas9$ , <i>prsA::P_{F6}-lacI</i> , <i>ssbB-luc</i>                   | This study               |

|               |                                                                                                                              |                          |
|---------------|------------------------------------------------------------------------------------------------------------------------------|--------------------------|
| ADP179        | $\Delta cep::P_3\text{-sgRNA-murD}$ , $\Delta bgaA::P_{Lac}\text{-dCas9}$ , $prsA::P_{F6}\text{-lacI}$ , $ssbB\text{-luc}$   | This study               |
| ADP180        | $\Delta cep::P_3\text{-sgRNA-murG}$ , $\Delta bgaA::P_{Lac}\text{-dCas9}$ , $prsA::P_{F6}\text{-lacI}$ , $ssbB\text{-luc}$   | This study               |
| ADP185        | $\Delta cep::P_3\text{-sgRNA-ftsW}$ , $\Delta bgaA::P_{Lac}\text{-dCas9}$ , $prsA::P_{F6}\text{-lacI}$ , $ssbB\text{-luc}$   | This study               |
| ADP187        | $\Delta cep::P_3\text{-sgRNA-murE}$ , $\Delta bgaA::P_{Lac}\text{-dCas9}$ , $prsA::P_{F6}\text{-lacI}$ , $ssbB\text{-luc}$   | This study               |
| ADP190        | $\Delta cep::P_3\text{-sgRNA-murF}$ , $\Delta bgaA::P_{Lac}\text{-dCas9}$ , $prsA::P_{F6}\text{-lacI}$ , $ssbB\text{-luc}$   | This study               |
| ADP203        | $\Delta cep::P_3\text{-sgRNA-murA-1}$ , $\Delta bgaA::P_{Lac}\text{-dCas9}$ , $prsA::P_{F6}\text{-lacI}$ , $ssbB\text{-luc}$ | This study               |
| ADP207        | $\Delta cep::P_3\text{-sgRNA-murC}$ , $\Delta bgaA::P_{Lac}\text{-dCas9}$ , $prsA::P_{F6}\text{-lacI}$ , $ssbB\text{-luc}$   | This study               |
| ADP245        | $\Delta cep::P_3\text{-mkate2}$ , $P_{ssbB}\text{-ssbB-gfp}$                                                                 | Moreno-Gómez et al. 2017 |
| ADP264        | $\Delta cep::P_3\text{-sgRNA-pbp3}$ , $\Delta bgaA::P_{Lac}\text{-dCas9}$ , $prsA::P_{F6}\text{-lacI}$ , $ssbB\text{-luc}$   | This study               |
| E. coli pLA18 | $DH5\alpha$ , plasmid $amp^r$ , $bgaA'$ , $tet^r$ , $P_{ssbB}\text{-luc\_gfp}$ , $'bgaA$                                     | Slager et al. 2014       |

113

114

## 115 **Supplementary methods**

116 **CRISPRi library:** to monitor the competence effect of the downregulation of genes involved in  
117 the cell wall synthesis, the PCR product of the fragment *ssbB-luc-kan* from strain MK134 (Slager  
118 et al. 2014) into the CRISPRi library of the indicated genes (Slager et al. 2014; Liu et al. 2017).  
119 Transformants were selected on Columbia blood agar containing 250 µg/ml kanamycin resulting  
120 in strains listed on table S6.

121 **ADP21 strain:** to monitor the effect of the chain formation on competence induction, the gene  
122 *lytB* encoding for the Autolysin B was replaced by the chloramphenicol resistance marker. The  
123 upstream region was amplified using primers ADP1/34 (GATGTGGTGAAAGCAGCTGTGGAAG)  
124 and ADP1/35+Ascl (CGATGGCGCGCCTCCTCTGTTCTTATTTATTTTATTG), the downstream  
125 region with primers ADP1/36+NotI (CGATGCGGCCGCTACTATAAGTGAATATGATTTGAGTG)  
126 and ADP1/37 (GTGTAGAAACCGTCCTCAACCAAG), and the chloramphenicol resistance  
127 marker with sPG11+Ascl (ACGTGGCGCGCCAGGAGGCATATCAAATGAAC) and sPG12+NotI  
128 (ACGTGCGGCCGCTTATAAAAGCCAGTCATTAG). All three fragments were digested with the  
129 proper restriction enzymes (*Ascl* and/or *NotI*) and ligated. The  $\Delta lytB::chl$  fragment containing the  
130 chloramphenicol resistance marker flanked by the sequence up- and downstream of *lytB* was  
131 transformed into DLA3 resulting in ADP21 strain ( $\Delta bgaA::P_{ssbB}-luc$ ,  $\Delta lytB::chl$ ). Transformants  
132 were selected on Columbia blood agar containing 4.5 µg/ml chloramphenicol. Correct deletion  
133 was verified by PCR and sequencing.

134 **ADP30 strain:** to monitor the effect of the PBP3 on competence, the related gene was replaced  
135 by the chloramphenicol resistance marker. The upstream region was amplified using primers  
136 ADP1/59 (GCCCTCAACTCAGCAGTATGG) and ADP1/60+Ascl  
137 (CGATGGCGCGCCTTATCCAAGTATCCCTCCATTTC), the downstream region with primers  
138 ADP1/61+NotI (CGATGCGGCCGCGAGGTAAGTCACTCATGTTTCGTAG) and ADP1/62  
139 (AAGCCTGCAATATGCAAGCGATCC), and the chloramphenicol resistance marker with  
140 sPG11+Ascl (ACGTGGCGCGCCAGGAGGCATATCAAATGAAC) and sPG12+NotI  
141 (ACGTGCGGCCGCTTATAAAAGCCAGTCATTAG). All three fragments were digested with the  
142 proper restriction enzymes (*Ascl* and/or *NotI*) and ligated. The  $\Delta pbp3::chl$  fragment containing the  
143 chloramphenicol resistance marker flanked by the sequence up- and downstream of *pbp3* was  
144 transformed into DLA3 resulting in ADP30 strain ( $\Delta bgaA::P_{ssbB}-luc$ ,  $\Delta pbp3::chl$ ). Transformants  
145 were selected on Columbia blood agar containing 4.5 µg/ml chloramphenicol. Correct deletion  
146 was verified by PCR and sequencing.

147 **ADP42 and ADP43 strains:** to test whether the ectopic hyperexpression of LytB in the  $\Delta$ *lytB*  
148 mutant restored the normal diplococcus phenotype and restored competence development to wild  
149 type, we created an inducible expression of LytB. The inducible system was created using  
150 BglFusion cloning (Sorg et al. 2015). To amplify the *lytB* fragment, primers ADP1/71+BglIII  
151 (ACGTAGATCTAGAGGAAGAAGGTTGATGAAGAAAG) and ADP1/72+XhoI  
152 (CATGCTCGAGTTACTGGAGGGATCCAGTACTAATCTTTG) were used using D39  
153 chromosomal DNA as a template. The construction was transformed to strain ADP21 and  
154 transformants (ADP42) were selected on Columbia blood agar containing 100  $\mu$ g/ml  
155 spectinomycin. Correct deletion was verified by PCR and sequencing. ADP42 shows a  
156 constitutive expression of LytB since it lacks the *lacI* repressor of the IPTG-inducible system. To  
157 control the expression of the LytB, we then transformed the codon optimized *lacI* gene into strain  
158 ADP42. For that, we PCR-ed the fragment including *lacI* integrated into the *prsA*-locus together  
159 with a gentamycin resistance cassette from chromosomal DNA of strain ADP95 (Moreno-Gómez  
160 et al. 2017) using primers OLI40 (CCATGGCATCAGCGAGAAGGTGATAC) and OLI41  
161 (GCGGCCGCAGGATAGAAAGGCGAGAG).
